# Supplementary material for: Two water-rich amphiphilic and hydrophilic coordination polymers: syntheses, structures and proton conduction behaviors in Nafion composite membranes
Source: Royal Society of Chemistry journal article supplement (doi:10.1039/d4ce00455h), 2024-01-01
Supplement: d4ce00455h1.pdf [file d4ce00455h1.pdf]

**Two water-rich amphiphilic and hydrophilic coordination polymers:  
syntheses, structures and proton conduction behaviors in Nafion  
composite membranes**

*Zhipeng Huan, Huiqi Zou, Na Wang, Jing Lu\*, Houting Liu\*, Suna Wang\*, Yunwu Li*

Table S1 The selected bond lengths and angels of compounds **1-2**.

| Compound 1          |            |                     |            |
|---------------------|------------|---------------------|------------|
| Cd(1)-O(7)          | 2.268(4)   | Cd(1)-O(1)          | 2.284(4)   |
| Cd(1)-O(4)#1        | 2.348(5)   | Cd(1)-O(3)#1        | 2.486(4)   |
| Cd(1)-O(2)          | 2.650(4)   | Cd(1)-N(1)          | 2.338(6)   |
| Cd(1)-N(2)          | 2.324(6)   | Cd(2)-O(9)          | 2.284(5)   |
| Cd(2)-O(5)          | 2.219(4)   | Cd(2)-O(8)          | 2.314(5)   |
| O(7)-Cd(1)-O(1)     | 98.88(17)  | O(7)-Cd(1)-N(2)     | 93.00(18)  |
| O(1)-Cd(1)-N(2)     | 137.69(18) | O(7)-Cd(1)-N(1)     | 162.3(2)   |
| O(1)-Cd(1)-N(1)     | 88.2(2)    | N(2)-Cd(1)-N(1)     | 71.2(2)    |
| O(7)-Cd(1)-O(4)#1   | 103.31(17) | O(1)-Cd(1)-O(4)#1   | 83.95(15)  |
| N(2)-Cd(1)-O(4)#1   | 132.37(17) | N(1)-Cd(1)-O(4)#1   | 93.6(2)    |
| O(7)-Cd(1)-O(3)#1   | 88.43(15)  | O(1)-Cd(1)-O(3)#1   | 136.85(16) |
| N(2)-Cd(1)-O(3)#1   | 83.57(17)  | N(1)-Cd(1)-O(3)#1   | 97.51(18)  |
| O(4)#1-Cd(1)-O(3)#1 | 53.11(14)  | O(7)-Cd(1)-O(2)     | 81.15(14)  |
| O(1)-Cd(1)-O(2)     | 52.00(14)  | N(2)-Cd(1)-O(2)     | 90.64(16)  |
| N(1)-Cd(1)-O(2)     | 90.72(17)  | O(4)#1-Cd(1)-O(2)   | 135.59(14) |
| O(3)#1-Cd(1)-O(2)   | 167.81(14) | O(5)-Cd(2)-O(9)#2   | 88.33(19)  |
| O(5)-Cd(2)-O(8)     | 91.63(17)  | O(5)-Cd(2)-O(9)     | 91.67(19)  |
| O(5)#2-Cd(2)-O(8)   | 88.37(17)  | O(9)#2-Cd(2)-O(8)   | 88.9(2)    |
| O(9)-Cd(2)-O(8)     | 91.1(2)    | O(5)-Cd(2)-O(8)#2   | 88.37(17)  |
| Compound 2          |            |                     |            |
| Zn(1)-O(1)          | 1.992(4)   | Zn(1)-O(2)          | 2.144(4)   |
| Zn(1)-O(3)          | 2.156(3)   | Zn(2)-O(5)          | 2.040(3)   |
| Zn(2)-O(6)          | 2.102(3)   | Zn(2)-O(7)          | 2.141(3)   |
| Zn(2)-O(8)          | 2.101(3)   | Zn(2)-O(9)          | 2.170(3)   |
| Zn(2)-O(10)         | 2.032(3)   |                     |            |
| O(1)#1-Zn(1)-O(1)   | 104.0(4)   | O(1)-Zn(1)-O(2)#1   | 94.12(16)  |
| O(1)-Zn(1)-O(2)     | 83.86(16)  | O(2)#1-Zn(1)-O(2)   | 176.7(2)   |
| O(1)-Zn(1)-O(3)#1   | 156.35(18) | O(2)#1-Zn(1)-O(3)#1 | 95.97(15)  |
| O(2)-Zn(1)-O(3)#1   | 86.85(14)  | O(1)-Zn(1)-O(3)     | 98.3(2)    |
| O(2)-Zn(1)-O(3)     | 95.97(15)  | O(3)#1-Zn(1)-O(3)   | 61.04(17)  |
| O(10)-Zn(2)-O(5)    | 173.76(15) | O(10)-Zn(2)-O(8)    | 89.94(13)  |
| O(5)-Zn(2)-O(8)     | 93.80(14)  | O(10)-Zn(2)-O(6)    | 90.50(13)  |

|                  |           |                  |            |
|------------------|-----------|------------------|------------|
| O(5)-Zn(2)-O(6)  | 86.10(13) | O(8)-Zn(2)-O(6)  | 176.11(15) |
| O(5)-Zn(2)-O(7)  | 90.99(13) | O(7)-Zn(2)-O(9)  | 178.83(15) |
| O(6)-Zn(2)-O(7)  | 87.93(14) | O(8)-Zn(2)-O(7)  | 88.18(14)  |
| O(5)-Zn(2)-O(9)  | 88.93(14) | O(8)-Zn(2)-O(9)  | 92.99(14)  |
| O(6)-Zn(2)-O(9)  | 90.90(14) | O(10)-Zn(2)-O(9) | 85.89(14)  |
| O(10)-Zn(2)-O(7) | 94.12(14) |                  |            |

Symmetry codes: compound **1** #1  $x-1, y, z$ ; #2  $-x+2, -y+2, -z+1$ ; #3  $x+1, y, z$ ; compound **2** #1  $-x+2, y, -z+1$ .

Table S2 The hydrogen bond parameters of compounds **1** and **2**.

| D-H $\cdots$ A                 | d(H $\cdots$ A) | $\angle$ DHA | d(D $\cdots$ A) |
|--------------------------------|-----------------|--------------|-----------------|
| Compound <b>1</b>              |                 |              |                 |
| O7-H $\cdots$ O6 <sup>a</sup>  | 1.862           | 169.18       | 2.702           |
| O7-H $\cdots$ O10              | 1.879           | 177.55       | 2.728           |
| O8-H $\cdots$ O6               | 2.281           | 115.28       | 2.754           |
| O8-H $\cdots$ O2 <sup>b</sup>  | 2.204           | 133.27       | 2.855           |
| O10-H $\cdots$ O4 <sup>c</sup> | 2.052           | 147.73       | 2.808           |
| O10-H $\cdots$ O1 <sup>d</sup> | 2.390           | 115.02       | 2.855           |
| Compound <b>2</b>              |                 |              |                 |
| O1-H $\cdots$ O12 <sup>e</sup> | 2.012           | 175.47       | 2.860           |
| O1-H $\cdots$ O6 <sup>f</sup>  | 1.850           | 158.37       | 2.658           |
| O2-H $\cdots$ O12 <sup>g</sup> | 2.044           | 163.17       | 2.868           |
| O2-H $\cdots$ O8 <sup>h</sup>  | 2.365           | 120.19       | 2.888           |
| O6-H $\cdots$ O11              | 2.088           | 113.54       | 2.549           |
| O6-H $\cdots$ O12 <sup>i</sup> | 2.272           | 123.57       | 2.832           |
| O7-H $\cdots$ O11 <sup>j</sup> | 1.831           | 176.25       | 2.680           |
| O7-H $\cdots$ O9 <sup>k</sup>  | 2.428           | 160.99       | 3.243           |
| O8-H $\cdots$ O3 <sup>l</sup>  | 2.210           | 138.24       | 2.900           |
| O8-H $\cdots$ O4               | 2.012           | 127.17       | 2.614           |
| O9-H $\cdots$ O4 <sup>m</sup>  | 1.915           | 165.12       | 2.745           |
| O9-H $\cdots$ O12 <sup>n</sup> | 2.332           | 149.03       | 3.092           |

Symmetry codes: compound **1** a  $-x+1, -y+1, -z+1$ ; b  $x, y+1, z$ ; c  $-x+2, -y+1, -z+1$ ; d  $-x+1, -y+1, -z+1$ ; e  $x+1/2, y+3/2, z$ ; f  $-x+2, y+1, -z+1$ ; g  $-x+3/2, y+3/2, -z$ ; h  $-x+3/2, y+1/2, -z$ ; i  $-x+3/2, y+1/2, -z$ ; j  $-x+3/2, y+1/2, -z$ ; k  $x, y, z-1$ ; l  $x-1/2, y-1/2, z$ ; m  $-x+3/2, y-1/2, -z+1$ ; n  $-x+3/2, y+1/2, -z+1$ .

Table S3. Proton conductivities ( $S \cdot cm^{-1}$ ) of pure Nafion membrane and **1**/Nafion-x composite membranes at different temperatures

| T (K) | pure Nafion           | <b>1</b> /Nafion-3    | <b>1</b> /Nafion-5     | <b>1</b> /Nafion-7    |
|-------|-----------------------|-----------------------|------------------------|-----------------------|
| 308   | $2.55 \times 10^{-3}$ | $2.42 \times 10^{-3}$ | $6.02 \times 10^{-3}$  | $3.90 \times 10^{-3}$ |
| 313   | $2.95 \times 10^{-3}$ | $2.47 \times 10^{-3}$ | $6.21 \times 10^{-3}$  | $4.54 \times 10^{-3}$ |
| 318   | $3.48 \times 10^{-3}$ | $3.59 \times 10^{-3}$ | $6.85 \times 10^{-3}$  | $5.05 \times 10^{-3}$ |
| 323   | $4.19 \times 10^{-3}$ | $4.55 \times 10^{-3}$ | $7.73 \times 10^{-3}$  | $4.79 \times 10^{-3}$ |
| 328   | $4.76 \times 10^{-3}$ | $5.55 \times 10^{-3}$ | $8.26 \times 10^{-3}$  | $5.37 \times 10^{-3}$ |
| 333   | $5.43 \times 10^{-3}$ | $6.62 \times 10^{-3}$ | $8.50 \times 10^{-3}$  | $6.20 \times 10^{-3}$ |
| 338   | $6.26 \times 10^{-3}$ | $7.64 \times 10^{-3}$ | $9.19 \times 10^{-3}$  | $6.11 \times 10^{-3}$ |
| 343   | $7.00 \times 10^{-3}$ | $8.51 \times 10^{-3}$ | $9.39 \times 10^{-3}$  | $7.12 \times 10^{-3}$ |
| 348   | $7.45 \times 10^{-3}$ | $9.32 \times 10^{-3}$ | $10.20 \times 10^{-3}$ | $7.91 \times 10^{-3}$ |
| 353   | $8.48 \times 10^{-3}$ | $9.86 \times 10^{-3}$ | $10.92 \times 10^{-3}$ | $8.81 \times 10^{-3}$ |

Table S4. Proton conductivities ( $S \cdot cm^{-1}$ ) of pure Nafion membrane and **2**/Nafion-x composite membranes at different temperatures

| T (K) | pure Nafion           | <b>2</b> /Nafion-1    | <b>2</b> /Nafion-3    | <b>2</b> /Nafion-5    |
|-------|-----------------------|-----------------------|-----------------------|-----------------------|
| 308   | $2.55 \times 10^{-3}$ | $2.95 \times 10^{-3}$ | $4.44 \times 10^{-3}$ | $4.36 \times 10^{-3}$ |
| 313   | $2.95 \times 10^{-3}$ | $3.99 \times 10^{-3}$ | $5.03 \times 10^{-3}$ | $4.85 \times 10^{-3}$ |
| 318   | $3.48 \times 10^{-3}$ | $4.75 \times 10^{-3}$ | $5.62 \times 10^{-3}$ | $5.26 \times 10^{-3}$ |
| 323   | $4.19 \times 10^{-3}$ | $5.20 \times 10^{-3}$ | $6.03 \times 10^{-3}$ | $5.73 \times 10^{-3}$ |
| 328   | $4.76 \times 10^{-3}$ | $6.38 \times 10^{-3}$ | $6.73 \times 10^{-3}$ | $6.43 \times 10^{-3}$ |
| 333   | $5.43 \times 10^{-3}$ | $6.97 \times 10^{-3}$ | $7.79 \times 10^{-3}$ | $7.30 \times 10^{-3}$ |
| 338   | $6.26 \times 10^{-3}$ | $7.65 \times 10^{-3}$ | $8.94 \times 10^{-3}$ | $7.83 \times 10^{-3}$ |

|     |                       |                        |                        |                        |
|-----|-----------------------|------------------------|------------------------|------------------------|
| 343 | $7.00 \times 10^{-3}$ | $8.36 \times 10^{-3}$  | $10.42 \times 10^{-3}$ | $9.02 \times 10^{-3}$  |
| 348 | $7.45 \times 10^{-3}$ | $9.42 \times 10^{-3}$  | $12.10 \times 10^{-3}$ | $9.94 \times 10^{-3}$  |
| 353 | $8.48 \times 10^{-3}$ | $10.65 \times 10^{-3}$ | $13.18 \times 10^{-3}$ | $11.41 \times 10^{-3}$ |

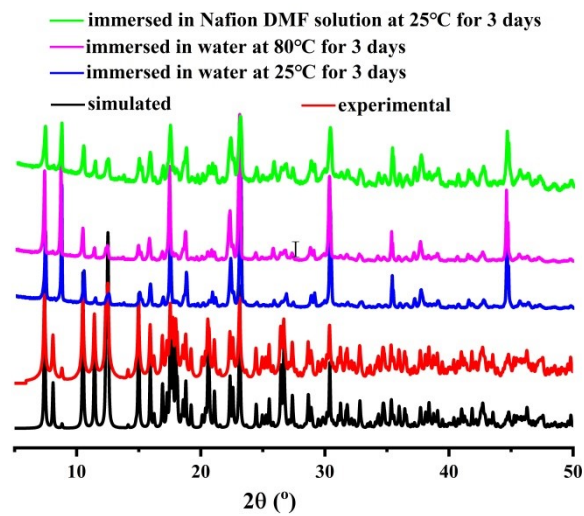

(a)

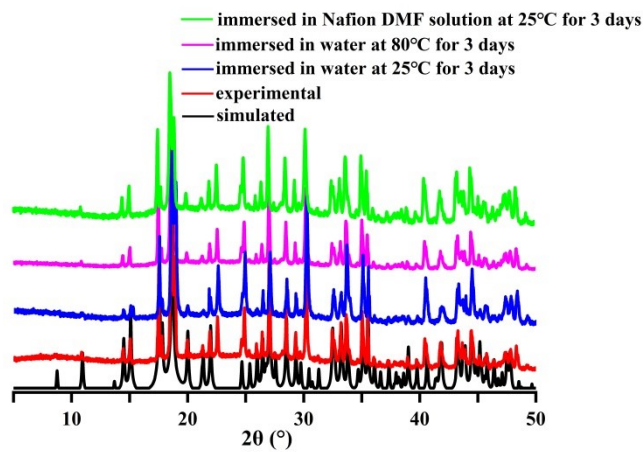

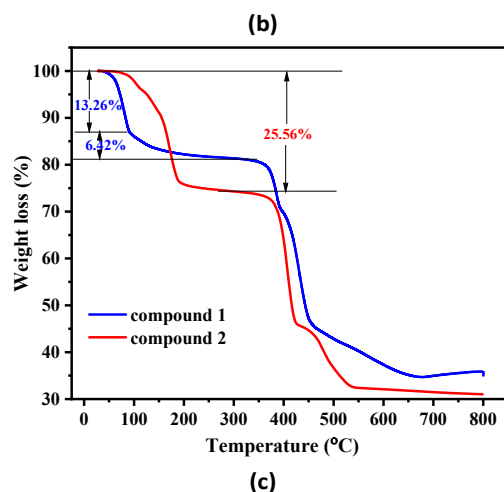

Fig. S1 Simulated, experiment water treatment and Nafion DMF treatment sample PXRD patterns of compounds **1** (a) and **2** (b); the TG curves of of compounds **1** and **2** (c).

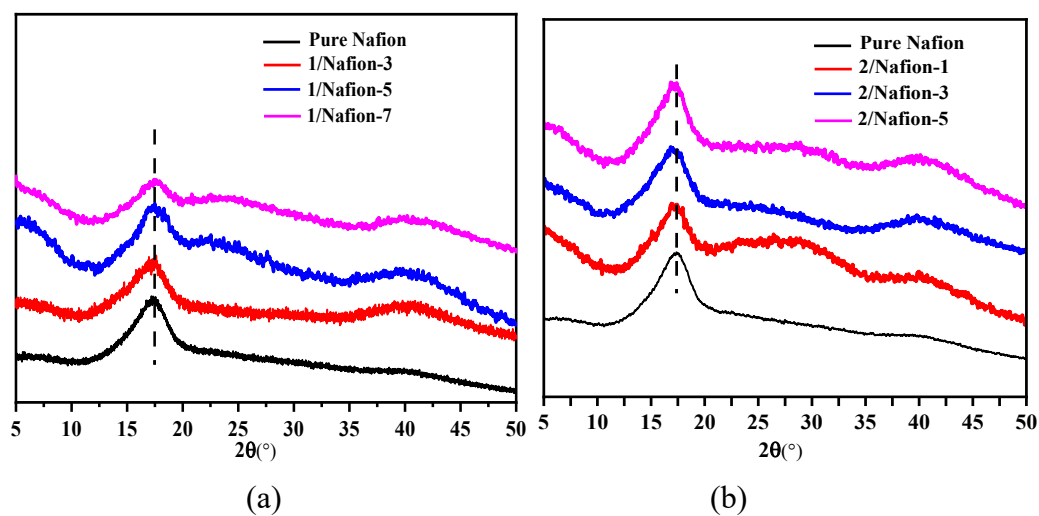

Fig. S2 PXRD of pure Nafion and **1**/Nafion-x (a) and PXRD of pure Nafion and **2**/Nafion-x (b).

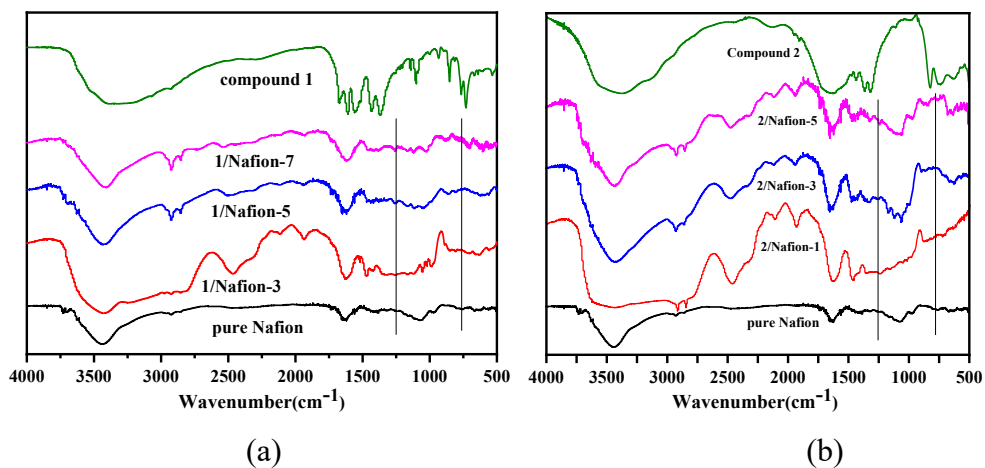

Fig. S3 IR spectra of pure Nafion and 1/Nafion-x (a) and PXRD of pure Nafion and 2/Nafion-x (b).

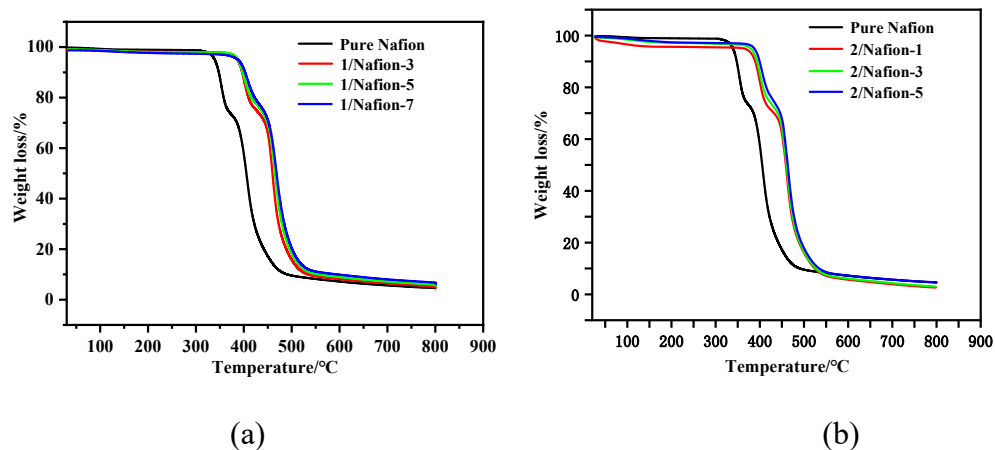

Fig. S4 TG curves of pure Nafion and 1/Nafion-x (a) and PXRD of pure Nafion and 2/Nafion-x (b).

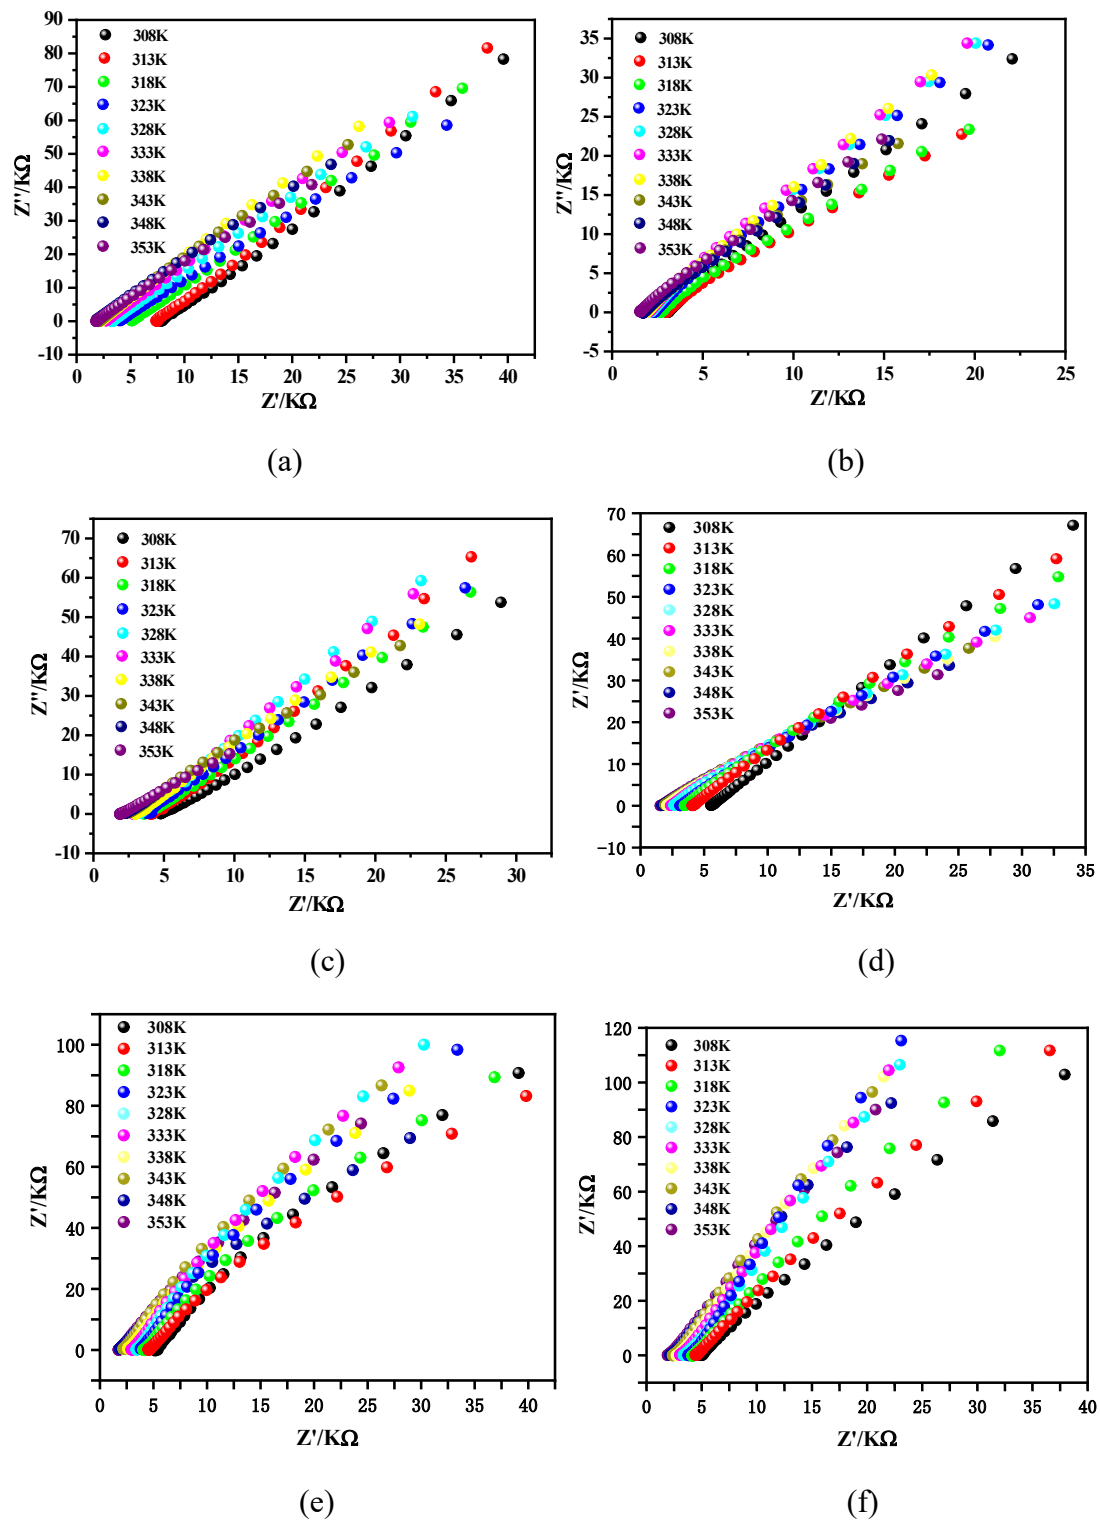

Fig. S4 Nyquist curves of 1/Nafion-3(a), 1/Nafion-5(b), 1/Nafion-7(c), 2/Nafion-1(d), 2/Nafion-3(e) and 2/Nafion-5(f) composite membranes at different temperatures.
